# Supplementary material for: Molecular Epidemiological Characterisation of ESBL- and Plasmid-Mediated AmpC-Producing Escherichia coli and Klebsiella pneumoniae at Kamuzu Central Hospital, Lilongwe, Malawi
Source: MDPI journal article supplement (doi:10.3390/tropicalmed7090245), 2022-09-14
Supplement: s1 [file s1]

ecoli

| RID    | KID  | ward       | specimen type   | Species          | MLST    | No. contigs |
|--------|------|------------|-----------------|------------------|---------|-------------|
| P30_79 | 10A  | surgical   | pus             | Escherichia_coli | ST-617  | 237         |
| P30_80 | 38   | surgical   | pus             | Escherichia_coli | ST-410  | 117         |
| P30_81 | 39   | surgical   | pus             | Escherichia_coli | ST-617  | 404         |
| P31_01 | 64   | surgical   | pus             | Escherichia_coli | ST-410  | 186         |
| P31_04 | 89b  | surgical   | pus             | Escherichia_coli | ST-410  | 148         |
| P31_05 | 90   | surgical   | urine           | Escherichia_coli | ST-410  | 199         |
| P31_06 | 93 b | medical    | urine           | Escherichia_coli | ST-44   | 269         |
| P31_07 | 99   | surgical   | pus             | Escherichia_coli | ST-155  | 116         |
| P31_08 | 100  | surgical   | pus             | Escherichia_coli | ST-410  | 153         |
| P31_10 | 143a | surgical   | urine           | Escherichia_coli | ST-6332 | 193         |
| P31_11 | 145  | surgical   | pus             | Escherichia_coli | ST-354  | 138         |
| P31_12 | 146  | surgical   | pus             | Escherichia_coli | ST-131  | 163         |
| P31_13 | 150a | surgical   | pus             | Escherichia_coli | ST-410  | 161         |
| P31_14 | 162  | medical    | urine           | Escherichia_coli | ST-410  | 142         |
| P31_15 | 168  | medical    | urine           | Escherichia_coli | ST-410  | 194         |
| P31_16 | 193  | surgical   | pus             | Escherichia_coli | ST-131  | 139         |
| P31_17 | 194  | surgical   | pus             | Escherichia_coli | ST-48   | 291         |
| P31_18 | 208  | surgical   | Labelled 215 A. | Escherichia_coli | ST-410  | 115         |
| P31_20 | 219  | medical    | urine           | Escherichia_coli | ST-410  | 121         |
| P31_22 | 222  | medical    | urine           | Escherichia_coli | ST-410  | 155         |
| P31_23 | 226  | medical    | blood culture   | Escherichia_coli | ST-410  | 126         |
| P31_25 | 249B | surgical   | pus             | Escherichia_coli | ST-38   | 183         |
| P31_26 | 277  | surgical   | pus             | Escherichia_coli | ST-410  | 127         |
| P31_27 | 348A | surgical   | urine           | Escherichia_coli | ST-131  | 158         |
| P31_30 | 405  | surgical   | pus             | Escherichia_coli | ST-648  | 188         |
| P31_31 | 443  | medical    | blood culture   | Escherichia_coli | ST-131  | 225         |
| P31_33 | 502A | surgical   | pus             | Escherichia_coli | ST-131  | 205         |
| P31_34 | 520  | obs&gynaec | pus             | Escherichia_coli | ST-5824 | 243         |
| P31_36 | 583  | surgical   |                 | Escherichia_coli | ST-131  | 136         |
| P31_37 | 585  | surgical   | pus             | Escherichia_coli | ST-410  | 142         |
| P31_39 | 604  | surgical   | pus             | Escherichia_coli | ST-410  | 120         |
| P31_40 | 615  | surgical   | pus             | Escherichia_coli | ST-617  | 220         |
| P31_43 | 634B | surgical   | pus             | Escherichia_coli | ST-617  | 191         |
| P31_44 | 639  | surgical   | pus             | Escherichia_coli | ST-410  | 121         |
| P31_47 | 266  | medical    | blood culture   | Escherichia_coli | ST-131  | 162         |
| P31_51 | 348B | surgical   | urine           | Escherichia_coli | ST-617  | 174         |
| P31_58 | 615  | surgical   | pus             | Escherichia_coli | ST-617  | 238         |

| Length  | Coverage | Aminoglycosides                                        |
|---------|----------|--------------------------------------------------------|
| 5053406 | 128.435  | aph(6)-Ild(100.00,100.00)   aph(3'')-Ib(100.00,100.00) |
| 4821435 | 153.572  | aac(3)-Ild(100.00,100.00)   aph(6)-Ild(100.00,100.00)  |
| 5146341 | 144.84   | aac(3)-Ild(100.00,100.00)   aadA5(100.00,100.00)       |
| 4856558 | 150.064  | aadA5(100.00,100.00)   aph(6)-Ild(100.00,100.00)       |
| 4906331 | 156.292  | aadA5(100.00,100.00)   aac(3)-Ild(100.00,100.00)       |
| 4909005 | 149.481  | aadA5(100.00,100.00)   aph(6)-Ild(100.00,100.00)       |
| 4925961 | 179.44   | aadA5(100.00,100.00)   aph(6)-Ild(100.00,100.00)       |
| 4877359 | 120.412  | aac(3)-Ild(100.00,100.00)                              |
| 4901033 | 149.398  | aadA5(100.00,100.00)   aac(3)-Ild(100.00,100.00)       |
| 4900455 | 155.752  | aph(6)-Ild(100.00,100.00)   aph(3'')-Ib(100.00,100.00) |
| 5040849 | 114.608  | aadA5(100.00,100.00)   aph(6)-Ild(100.00,100.00)       |
| 5102809 | 120.845  | aadA5(100.00,100.00)   aph(3'')-Ib(100.00,100.00)      |
| 4896957 | 141.706  | aadA5(100.00,100.00)   aac(3)-Ild(100.00,100.00)       |
| 4909249 | 112.607  | aadA5(100.00,100.00)   aac(3)-Ild(100.00,100.00)       |
| 4912714 | 241.745  | aadA5(100.00,100.00)   aph(6)-Ild(100.00,100.00)       |
| 5154208 | 112.871  | aadA5(100.00,100.00)   aph(6)-Ild(100.00,100.00)       |
| 4803866 | 115.526  | aph(6)-Ild(100.00,100.00)   aph(3'')-Ib(100.00,100.00) |
| 4848605 | 146.061  | aadA5(100.00,100.00)   aph(6)-Ild(100.00,100.00)       |
| 4889860 | 135.075  | aadA5(100.00,100.00)   aac(3)-Ild(100.00,100.00)       |
| 4818732 | 143.477  | aadA5(100.00,100.00)   aph(6)-Ild(100.00,100.00)       |
| 4818990 | 129.043  | aadA5(100.00,100.00)   aac(3)-Ild(100.00,100.00)       |
| 5403751 | 55.7029  | aadA1(100.00,100.00)   aph(6)-Ild(100.00,100.00)       |
| 4830344 | 150.564  | aac(3)-Ild(100.00,100.00)   aadA5(100.00,100.00)       |
| 5087754 | 106.167  | aadA5(100.00,100.00)   aph(6)-Ild(100.00,100.00)       |
| 5287481 | 145.377  | aadA5(100.00,100.00)   aph(3'')-Ib(100.00,100.00)      |
| 5233250 | 118.84   | aadA5(100.00,100.00)   aph(3'')-Ib(100.00,100.00)      |
| 5044830 | 116.055  | aadA5(100.00,100.00)   aph(6)-Ild(100.00,100.00)       |
| 4989743 | 116.139  | aph(6)-Ild(100.00,100.00)   aadA1(100.00,100.00)       |
| 5079574 | 121.85   | aadA5(100.00,100.00)   aph(6)-Ild(100.00,100.00)       |
| 4813475 | 113.754  | aadA5(100.00,100.00)   aac(3)-Ild(100.00,100.00)       |
| 4825829 | 116.221  | aadA5(100.00,100.00)   aph(6)-Ild(100.00,100.00)       |
| 5213707 | 110.393  | aac(3)-Ild(100.00,100.00)   aadA5(100.00,100.00)       |
| 5060787 | 255.787  | aac(3)-Ild(100.00,100.00)   aadA5(100.00,100.00)       |
| 4801908 | 138.334  | aadA5(100.00,100.00)   aph(3'')-Ib(100.00,100.00)      |
| 5092957 | 110.788  | aadA5(100.00,100.00)   aph(3'')-Ib(100.00,100.00)      |
| 4938514 | 79.7426  | aadA2(100.00,100.00)   aph(3'')-Ib(100.00,100.00)      |
| 5214881 | 116.321  | aph(6)-Ild(100.00,100.00)   aph(3'')-Ib(100.00,100.00) |

**Aminoglycosides/quinolones**

aac(6')-lb-cr5(100.00,100.00)  
 aac(6')-lb-cr5(100.00,100.00)  
 aac(6')-lb-cr5(100.00,100.00)  
 aac(6')-lb-cr5(100.00,100.00)  
 aac(6')-lb-cr5(100.00,100.00)  
 aac(6')-lb-cr5(100.00,100.00)  
 nil  
 aac(6')-lb-cr5(100.00,100.00)  
 aac(6')-lb-cr5(100.00,100.00)  
 nil  
 nil  
 aac(6')-lb-cr5(100.00,100.00)  
 aac(6')-lb-cr5(100.00,100.00)  
 aac(6')-lb-cr5(100.00,100.00)  
 nil  
 nil  
 aac(6')-lb-cr5(100.00,100.00)  
 aac(6')-lb-cr5(100.00,100.00)  
 aac(6')-lb-cr5(100.00,100.00)  
 aac(6')-lb-cr5(100.00,100.00)  
 nil  
 aac(6')-lb-cr5(100.00,100.00)  
 nil  
 aac(6')-lb-cr5(100.00,100.00)  
 nil  
 nil  
 nil  
 nil  
 aac(6')-lb-cr5(100.00,100.00)  
 aac(6')-lb-cr5(100.00,100.00)  
 aac(6')-lb-cr5(100.00,100.00)  
 aac(6')-lb-cr5(100.00,100.00)  
 aac(6')-lb-cr5(100.00,100.00)  
 nil  
 aac(6')-lb-cr5(100.00,100.00)  
 aac(6')-lb-cr5(100.00,100.00)

**Betalactams**

blaCTX-M-15(100.00,100.00) | blaOX catA1(100.00,100.00)  
 blaCMY-2(100.00,100.00) | blaTEM-1 nil  
 blaCTX-M-15(100.00,100.00) | blaOX catA1(100.00,100.00)  
 blaOXA-1(100.00,100.00) | blaCTX-M nil  
 blaCMY-2(100.00,100.00) | blaTEM-1 nil  
 blaCMY-2(100.00,100.00) | blaTEM-1 nil  
 blaCTX-M-15(100.00,100.00) | blaTE nil  
 blaCTX-M-15(100.00,100.00) | blaTE nil  
 blaCMY-2(100.00,100.00) | blaTEM-1 nil  
 blaCTX-M-15(100.00,100.00) | blaOX nil  
 blaCTX-M-27(100.00,100.00) | blaTE nil  
 blaTEM-1(100.00,100.00) | blaCTX-M nil  
 blaCMY-2(100.00,100.00) | blaTEM-1 nil  
 blaCMY-2(100.00,100.00) | blaTEM-1 nil  
 blaCMY-2(100.00,100.00) | blaCTX-M nil  
 blaCTX-M-27(100.00,100.00) nil  
 blaCTX-M-15(100.00,100.00) | blaTE catA1(100.00,100.00)  
 blaCMY-2(100.00,100.00) | blaTEM-1 nil  
 blaCMY-2(100.00,100.00) | blaTEM-1 nil  
 blaCMY-2(100.00,100.00) | blaTEM-1 nil  
 blaCMY-2(100.00,100.00) | blaTEM-1 nil  
 blaCTX-M-15(100.00,100.00) | blaTE nil  
 blaCMY-2(100.00,100.00) | blaTEM-1 nil  
 blaCTX-M-27(100.00,100.00) | blaTE nil  
 blaTEM-1(100.00,100.00) | blaCTX-M catA1(100.00,100.00)  
 blaCTX-M-27(100.00,100.00) nil  
 blaTEM-1(100.00,100.00) | blaCTX-M nil  
 blaCTX-M-14(100.00,100.00) nil  
 blaCTX-M-27(100.00,100.00) nil  
 blaCMY-2(100.00,100.00) | blaTEM-1 nil  
 blaCMY-2(100.00,100.00) | blaTEM-1 nil  
 blaOXA-1(100.00,100.00) | blaTEM-1 catA1(100.00,100.00)  
 blaCTX-M-15(100.00,100.00) | blaOX catA1(100.00,100.00)  
 blaCMY-2(100.00,100.00) | blaCTX-M nil  
 blaCTX-M-15(100.00,100.00) | blaTE nil  
 blaTEM-1(100.00,100.00) | blaCTX-M nil  
 blaCTX-M-15(100.00,100.00) | blaOX catA1(100.00,100.00)

**Phenicol**

**Quarternary ammonium cc Macrolides****Streptothricin**

|                           |                             |                     |
|---------------------------|-----------------------------|---------------------|
| qacEdelta1(100.00,100.00) | mph(A)(100.00,100.00)       | nil                 |
| qacEdelta1(100.00,100.00) | mph(A)(100.00,99.67)        | nil                 |
| nil                       | nil                         | nil                 |
| qacEdelta1(100.00,100.00) | mph(A)(100.00,100.00)       | nil                 |
| nil                       | mph(A)(100.00,100.00)       | nil                 |
| qacEdelta1(100.00,100.00) | mph(A)(100.00,100.00)   erm | nil                 |
| qacEdelta1(100.00,100.00) | mph(A)(100.00,100.00)       | nil                 |
| qacEdelta1(100.00,100.00) | mph(A)(100.00,99.67)        | nil                 |
| qacEdelta1(100.00,100.00) | mph(A)(100.00,100.00)       | nil                 |
| nil                       | nil                         | sat2(100.00,100.00) |
| qacEdelta1(100.00,100.00) | mph(A)(100.00,100.00)       | nil                 |
| nil                       | nil                         | sat2(100.00,100.00) |
| qacEdelta1(100.00,100.00) | mph(A)(100.00,100.00)       | nil                 |

ecoli

## Sulfonamider

## Tetrasykliner

[illegible]

ecoli

**Trimetoprim**

dfrA17(100.00,100.00)  
dfrA17(94.27,100.00)  
dfrA17(100.00,100.00)  
dfrA17(100.00,100.00)  
dfrA17(100.00,100.00)  
dfrA17(100.00,100.00)  
dfrA17(100.00,100.00) | dfrA8(100.00,100.00)  
nil  
dfrA17(100.00,100.00)  
dfrA14(100.00,100.00)  
dfrA17(100.00,100.00)  
dfrA17(100.00,100.00)  
dfrA17(100.00,100.00)  
dfrA17(100.00,100.00)  
dfrA17(100.00,100.00)  
dfrA12(100.00,100.00)  
dfrA17(100.00,100.00)  
dfrA17(100.00,100.00)  
dfrA17(100.00,100.00)  
dfrA17(100.00,100.00)  
dfrA1(100.00,100.00)  
dfrA17(100.00,100.00)  
dfrA17(92.99,100.00)  
dfrA17(100.00,100.00)  
dfrA17(100.00,100.00)  
dfrA17(100.00,100.00)  
dfrA1(100.00,100.00)  
dfrA17(100.00,100.00)  
dfrA17(100.00,100.00)  
dfrA17(100.00,100.00)  
dfrA17(100.00,100.00)  
dfrA17(100.00,100.00)  
dfrA17(100.00,100.00)  
dfrA17(100.00,100.00)  
dfrA17(100.00,100.00)  
dfrA12(100.00,100.00)  
dfrA17(100.00,100.00)

**Fosfomycin Fosmidomycin**

nil nil  
uhpT\_E350Q cyaA\_S352T(100.00,99.29)  
uhpT\_E350Q nil  
nil nil  
nil nil  
nil nil  
uhpT\_E350Q nil  
nil nil  
uhpT\_E350Q nil  
nil cyaA\_S352T(100.00,99.29)  
ptsI\_V25I(10 nil  
uhpT\_E350Q nil  
nil nil  
ptsI\_V25I(10 nil  
nil nil  
nil nil  
nil nil  
nil nil  
nil nil  
uhpT\_E350Q nil  
nil nil  
nil nil

**Quinolones\_mutation**

parE\_S458A(100.00,99.68) | parC\_S80I(100.00,99.87) |   
 parC\_S80I(100.00,99.87) | parE\_S458A(100.00,99.68) |   
 parC\_S80I(100.00,99.87) | parE\_S458A(100.00,99.68) |   
 gyrA\_D87N(99.66,98.97) | gyrA\_S83L(99.66,98.97) | parC\_S80I(100.00,99.87) | parE\_S458A(100.00,99.68) |   
 parC\_S80I(100.00,99.87) | parE\_S458A(100.00,99.68) |   
 nil  
 nil  
 parE\_S458A(100.00,99.68) | parC\_S80I(100.00,99.87) |   
 parC\_S80I(100.00,99.87) | parE\_S458A(100.00,99.68) |   
 gyrA\_D87N(99.66,98.97) | gyrA\_S83L(99.66,98.97) | parC\_S80I(100.00,99.87) | parE\_S458A(100.00,99.68) |   
 parC\_S80I(100.00,99.87) | parE\_S458A(100.00,99.68) |   
 parC\_S80I(100.00,99.87) | parE\_S458A(100.00,99.68) |   
 parC\_S80I(100.00,99.87) | parE\_S458A(100.00,99.68) |   
 gyrA\_D87N(99.66,98.86) | gyrA\_S83L(99.66,98.86) | parC\_S80I(100.00,99.87) | parE\_S458A(100.00,99.68) |   
 gyrA\_S83A(99.66,99.09)  
 parC\_S80I(100.00,99.87) | parE\_S458A(100.00,99.68) |   
 gyrA\_D87N(99.66,98.97) | gyrA\_S83L(99.66,98.97) | parC\_S80I(100.00,99.87) | parE\_S458A(100.00,99.68) |   
 parC\_S80I(100.00,99.87) | parE\_S458A(100.00,99.68) |   
 nil  
 gyrA\_D87N(99.66,98.97) | gyrA\_S83L(99.66,98.97) | parC\_S80I(100.00,99.87) | parE\_S458A(100.00,99.68) |   
 gyrA\_D87N(99.66,98.86) | gyrA\_S83L(99.66,98.86) | parC\_S80I(100.00,99.87) | parE\_S458A(100.00,99.68) |   
 gyrA\_D87N(99.66,98.74) | gyrA\_S83L(99.66,98.74) | parC\_S80I(100.00,99.87) | parE\_S458A(100.00,99.68) |   
 parC\_E84V(100.00,99.20) | parC\_S80I(100.00,99.20) | parE\_S458A(100.00,99.68) | parC\_S80I(100.00,99.60) |   
 parE\_E460D(100.00,99.68) | parC\_S80I(100.00,99.60) |   
 nil  
 gyrA\_D87N(99.66,98.86) | gyrA\_S83L(99.66,98.86) | parC\_S80I(100.00,99.87) | parE\_S458A(100.00,99.68) |   
 gyrA\_D87N(99.66,98.97) | gyrA\_S83L(99.66,98.97) | parC\_S80I(100.00,99.87) | parE\_S458A(100.00,99.68) |   
 parC\_S80I(100.00,99.87) | parE\_S458A(100.00,99.68) |   
 gyrA\_D87N(99.66,98.86) | gyrA\_S83L(99.66,98.86) | parC\_S80I(100.00,99.87) | parE\_S458A(100.00,99.68) |   
 nil  
 parC\_S80I(100.00,99.87) | parE\_S458A(100.00,99.68) |   
 gyrA\_S83L(99.66,98.86) | parE\_I529L(100.00,99.52)  
 parE\_S458A(100.00,99.68) | parC\_S80I(100.00,99.87) |   
 parC\_S80I(100.00,99.87) | parE\_S458A(100.00,99.68) |

**Plasmids**

Col(pHAD28)\_1\_KU674895 | FIA(pBK30683)\_1\_KF954760 | IncFIA\_1\_AP001918 | IncFIB(AP001  
FIA(pBK30683)\_1\_KF954760 | IncFIA\_1\_AP001918 | IncFIB(AP001918)\_1\_AP001918 | IncFII(pA  
Col(pHAD28)\_1\_KU674895 | FIA(pBK30683)\_1\_KF954760 | IncFIA\_1\_AP001918 | IncFIB(AP001  
Col(pHAD28)\_1\_KU674895 | Col156\_1\_NC\_009781 | FIA(pBK30683)\_1\_KF954760 | IncFIA\_1\_A  
Col(BS512)\_1\_NC\_010656 | Col(MG828)\_1\_NC\_008486 | FIA(pBK30683)\_1\_KF954760 | IncFIA  
Col(BS512)\_1\_NC\_010656 | Col(MG828)\_1\_NC\_008486 | FIA(pBK30683)\_1\_KF954760 | IncFIA  
Col(BS512)\_1\_NC\_010656 | Col(MG828)\_1\_NC\_008486 | Col(pHAD28)\_1\_KU674895 | Col440I\_1  
Col(pHAD28)\_1\_KU674895 | FIA(pBK30683)\_1\_KF954760 | IncFIA\_1\_AP001918 | IncFIB(S)\_1\_F  
Col(BS512)\_1\_NC\_010656 | Col(MG828)\_1\_NC\_008486 | FIA(pBK30683)\_1\_KF954760 | IncFIA  
FIA(pBK30683)\_1\_KF954760 | IncFIA\_1\_AP001918 | IncFIB(AP001918)\_1\_AP001918 | IncFIC(F  
FIA(pBK30683)\_1\_KF954760 | IncFIA\_1\_AP001918 | IncFIB(S)\_1\_FN432031 | IncFIB(pB171)\_1\_  
Col156\_1\_NC\_009781 | FIA(pBK30683)\_1\_KF954760 | IncFIA\_1\_AP001918 | IncFIB(AP001918)  
Col(BS512)\_1\_NC\_010656 | Col(MG828)\_1\_NC\_008486 | FIA(pBK30683)\_1\_KF954760 | IncFIA  
Col(BS512)\_1\_NC\_010656 | Col(MG828)\_1\_NC\_008486 | FIA(pBK30683)\_1\_KF954760 | IncFIA  
Col(BS512)\_1\_NC\_010656 | Col(MG828)\_1\_NC\_008486 | FIA(pBK30683)\_1\_KF954760 | IncFIA  
Col156\_1\_NC\_009781 | Col(MG828)\_1\_NC\_008486 | FIA(pBK30683)\_1\_KF954760 | IncFIA\_1\_A  
Col(BS512)\_1\_NC\_010656 | Col(MG828)\_1\_NC\_008486 | Col(pHAD28)\_1\_KU674895 | IncFIB(A  
FIA(pBK30683)\_1\_KF954760 | IncFIA\_1\_AP001918 | IncFIB(AP001918)\_1\_AP001918 | IncFII\_1\_  
Col(BS512)\_1\_NC\_010656 | Col(MG828)\_1\_NC\_008486 | FIA(pBK30683)\_1\_KF954760 | IncFIA  
Col(BS512)\_1\_NC\_010656 | FIA(pBK30683)\_1\_KF954760 | IncFIA\_1\_AP001918 | IncFIB(AP001  
Col(BS512)\_1\_NC\_010656 | FIA(pBK30683)\_1\_KF954760 | IncFIA\_1\_AP001918 | IncFIB(AP001  
IncFIB(AP001918)\_1\_AP001918 | IncFII(29)\_1\_CP003035 | IncFII(pAMA1167-NDM-5)\_1\_CP024  
Col(BS512)\_1\_NC\_010656 | FIA(pBK30683)\_1\_KF954760 | IncFIA\_1\_AP001918 | IncFIB(AP001  
Col156\_1\_NC\_009781 | Col(MG828)\_1\_NC\_008486 | ColRNAI\_1\_DQ298019 | FIA(pBK30683)\_1  
Col(BS512)\_1\_NC\_010656 | Col(pHAD28)\_1\_KU674895 | FIA(pBK30683)\_1\_KF954760 | IncFIA  
Col156\_1\_NC\_009781 | Col(MG828)\_1\_NC\_008486 | FIA(pBK30683)\_1\_KF954760 | IncFIA\_1\_A  
Col156\_1\_NC\_009781 | ColRNAI\_1\_DQ298019 | FIA(pBK30683)\_1\_KF954760 | IncFIA\_1\_AP00  
Col156\_1\_NC\_009781 | Col(BS512)\_1\_NC\_010656 | Col(pHAD28)\_1\_KU674895 | IncFIB(AP001  
Col156\_1\_NC\_009781 | FIA(pBK30683)\_1\_KF954760 | IncFIA\_1\_AP001918 | IncFIB(AP001918)  
Col(BS512)\_1\_NC\_010656 | FIA(pBK30683)\_1\_KF954760 | IncFIA\_1\_AP001918 | IncFIB(AP001  
Col(BS512)\_1\_NC\_010656 | FIA(pBK30683)\_1\_KF954760 | IncFIA\_1\_AP001918 | IncFIB(AP001  
Col(pHAD28)\_1\_KU674895 | FIA(pBK30683)\_1\_KF954760 | IncFIA\_1\_AP001918 | IncFIB(AP001  
Col(pHAD28)\_1\_KU674895 | FIA(pBK30683)\_1\_KF954760 | IncFIA\_1\_AP001918 | IncFIB(AP001  
FIA(pBK30683)\_1\_KF954760 | IncFIA\_1\_AP001918 | IncFIB(AP001918)\_1\_AP001918 | IncFIC(F  
Col156\_1\_NC\_009781 | IncFIB(AP001918)\_1\_AP001918 | IncFIC(FII)\_1\_AP001918 | IncFII(29)\_  
Col(pHAD28)\_1\_KU674895 | FIA(pBK30683)\_1\_KF954760 | IncFIA\_1\_AP001918 | IncFIB(AP001  
Col(pHAD28)\_1\_KU674895 | FIA(pBK30683)\_1\_KF954760 | IncFIA\_1\_AP001918 | IncFIB(AP001



| ecoli   |     |         |     |         |     |
|---------|-----|---------|-----|---------|-----|
| ≥20/<17 |     | ≥19/<19 |     | ≥19/<19 |     |
| CTX     | CTX | FOX     | FOX | CXM     | CXM |
| 6       | R   | 18      | R   | 6       | R   |
| 6       | R   | 6       | R   | 6       | R   |
| 6       | R   | 20      | S   | 6       | R   |
| 6       | R   | 21      | S   | 6       | R   |
| 6       | R   | 6       | R   | 6       | R   |
| 6       | R   | 6       | R   | 6       | R   |
| 6       | R   | 21      | S   | 6       | R   |
| 6       | R   | 24      | S   | 6       | R   |
| 6       | R   | 6       | R   | 6       | R   |
| 10      | R   | 23      | S   | 6       | R   |
| 6       | R   | 18      | R   | 6       | R   |
| 6       | R   | 21      | S   | 6       | R   |
| 6       | R   | 6       | R   | 6       | R   |
| 6       | R   | 6       | R   | 6       | R   |
| 6       | R   | 19      | S   | 6       | R   |
| 6       | R   | 26      | S   | 6       | R   |
| 6       | R   | 6       | R   | 6       | R   |
| 6       | R   | 6       | R   | 6       | R   |
| 6       | R   | 6       | R   | 6       | R   |
| 6       | R   | 23      | S   | 6       | R   |
| 6       | R   | 6       | R   | 6       | R   |
| 6       | R   | 23      | S   | 6       | R   |
| 6       | R   | 20      | S   | 6       | R   |
| 6       | R   | 22      | S   | 6       | R   |
| 8       | R   | 24      | S   | 6       | R   |
| 6       | R   | 23      | S   | 6       | R   |
| 6       | R   | 22      | S   | 6       | R   |
| 6       | R   | 6       | R   | 6       | R   |
| 6       | R   | 6       | R   | 6       | R   |
| 6       | R   | 20      | S   | 6       | R   |
| 6       | R   | 21      | S   | 6       | R   |
| 8       | R   | 6       | R   | 6       | R   |
| 6       | R   | 22      | S   | 6       | R   |
| 6       | R   | 6       | R   | 6       | R   |
| 6       | R   | 21      | S   | 6       | R   |

| ecoli   |     |         |      |         |     |         |
|---------|-----|---------|------|---------|-----|---------|
| ≥14/<11 |     | ≥17/<14 |      | ≥26/<24 |     | ≥22/<16 |
| SXT     | SXT | CN10    | CN10 | CIP     | CIP | MEM     |
| 6       | R   | 6       | R    | 6       | R   | 29      |
| 6       | R   | 8       | R    | 6       | R   | 27      |
| 6       | R   | 6       | R    | 6       | R   | 29      |
| 6       | R   | 19      | S    | 6       | R   | 29      |
| 6       | R   | 7       | R    | 6       | R   | 27      |
| 6       | R   | 8       | R    | 6       | R   | 26      |
| 6       | R   | 8       | R    | 6       | R   | 29      |
| 25      | S   | 7       | R    | 27      | S   | 28      |
| 6       | R   | 6       | R    | 6       | R   | 28      |
| 6       | R   | 7       | R    | 6       | R   | 30      |
| 6       | R   | 20      | S    | 6       | R   | 32      |
| 6       | R   | 6       | R    | 20      | S   | 29      |
| 6       | R   | 8       | R    | 6       | R   | 28      |
| 6       | R   | 8       | R    | 6       | R   | 27      |
| 6       | R   | 8       | R    | 6       | R   | 28      |
| 6       | R   | 20      | S    | 6       | R   | 31      |
| 11      | R   | 10      | R    | 26      | S   | 28      |
| 6       | R   | 7       | R    | 6       | R   | 29      |
| 6       | R   | 8       | R    | 6       | R   | 25      |
| 6       | R   | 7       | R    | 6       | R   | 28      |
| 6       | R   | 9       | R    | 6       | R   | 30      |
| 6       | R   | 22      | S    | 24      | S   | 30      |
| 6       | R   | 8       | R    | 6       | R   | 28      |
| 6       | R   | 18      | S    | 6       | R   | 31      |
| 6       | R   | 6       | R    | 6       | R   | 28      |
| 6       | R   | 20      | S    | 6       | R   | 31      |
| 6       | R   | 19      | S    | 6       | R   | 31      |
| 6       | R   | 6       | R    | 6       | R   | 29      |
| 6       | R   | 19      | S    | 6       | R   | 28      |
| 6       | R   | 8       | R    | 6       | R   | 28      |
| 6       | R   | 8       | R    | 6       | R   | 26      |
| 6       | R   | 8       | R    | 6       | R   | 28      |
| 6       | R   | 8       | R    | 6       | R   | 30      |
| 6       | R   | 6       | R    | 6       | R   | 27      |
| 6       | R   | 19      | S    | 24      | S   | 30      |
| 6       | R   | 6       | R    | 6       | R   | 30      |
| 6       | R   | 8       | R    | 6       | R   | 30      |

| ecoli |         |     |         |     |         |     |
|-------|---------|-----|---------|-----|---------|-----|
|       | ≥20/<17 |     | ≥26/<21 |     | ≥22/<19 |     |
| MEM   | TZP     | TZP | ATM     | ATM | CAZ     | CAZ |
| S     | 15      | R   | 8       | R   | 8       | R   |
| S     | 10      | R   | 6       | R   | 6       | R   |
| S     | 10      | R   | 7       | R   | 7       | R   |
| S     | 18      | I   | 10      | R   | 9       | R   |
| S     | 8       | R   | 6       | R   | 6       | R   |
| S     | 8       | R   | 6       | R   | 6       | R   |
| S     | 16      | R   | 10      | R   | 10      | R   |
| S     | 21      | S   | 14      | R   | 13      | R   |
| S     | 10      | R   | 6       | R   | 6       | R   |
| S     | 16      | R   | 10      | R   | 10      | R   |
| S     | 23      | S   | 16      | R   | 16      | R   |
| S     | 21      | S   | 14      | R   | 15      | R   |
| S     | 8       | R   | 6       | R   | 6       | R   |
| S     | 9       | R   | 6       | R   | 6       | R   |
| S     | 9       | R   | 6       | R   | 6       | R   |
| S     | 21      | S   | 15      | R   | 13      | R   |
| S     | 23      | S   | 19      | R   | 18      | R   |
| S     | 9       | R   | 6       | R   | 6       | R   |
| S     | 8       | R   | 6       | R   | 6       | R   |
| S     | 8       | R   | 6       | R   | 6       | R   |
| S     | 9       | R   | 6       | R   | 6       | R   |
| S     | 22      | S   | 11      | R   | 11      | R   |
| S     | 9       | R   | 6       | R   | 6       | R   |
| S     | 23      | S   | 19      | R   | 17      | R   |
| S     | 18      | I   | 11      | R   | 12      | R   |
| S     | 23      | S   | 20      | R   | 17      | R   |
| S     | 22      | S   | 19      | R   | 17      | R   |
| S     | 20      | S   | 14      | R   | 13      | R   |
| S     | 22      | S   | 18      | R   | 11      | R   |
| S     | 10      | R   | 6       | R   | 6       | R   |
| S     | 9       | R   | 6       | R   | 6       | R   |
| S     | 18      | I   | 12      | R   | 12      | R   |
| S     | 18      | I   | 13      | R   | 13      | R   |
| S     | 14      | R   | 6       | R   | 6       | R   |
| S     | 22      | S   | 17      | R   | 18      | R   |
| S     | 6       | R   | 6       | R   | 6       | R   |
| S     | 17      | I   | 12      | R   | 12      | R   |
